# Supplementary material for: EU protected area network did not prevent a country wide population decline in a threatened grassland bird
Source: PeerJ. 2018 Jan 23;6:e4284. doi: 10.7717/peerj.4284 (PMC5786059; doi:10.7717/peerj.4284)
Supplement: Data S1 [file peerj-06-4284-s004.xlsx]

## Sheet: Data_censos_lb_21122016
Area_name	Area_ha	SPA	Census	Density	Area sampled	N_males	N_points	Grassland_ha
A Chao	2000	0	2016	2.6	0	12	23	975
Airoso	2094	1	2016	0	4.7	0	24	610.8
bb_1	2502	0	2016	1.1	3.7	4	19	543.2
bb_14	2501	0	2016	0	4.7	0	24	130.3
bb_28	2507	0	2016	0	4.9	0	25	426.2
bb_33	2701	0	2016	0	4.9	0	25	243.1
bb_39	2333	0	2016	0	4.9	0	25	898.2
bb_43	2469	0	2016	0.4	4.9	2	25	777.7
bb_44	2501	0	2016	0.4	4.9	2	25	475.2
bb_5	2789	0	2016	2.4	4.5	11	23	184.9
bb_6	2501	0	2016	0	4.9	0	25	175.1
C Casevel	3001	1	2016	4.9	5.5	27	28	2049.8
C Entradas	2990	1	2016	5.3	5.9	31	30	1420.3
C Maior	3112	1	2016	1.1	5.3	6	27	374.6
C Salto	3005	1	2016	1.7	4.7	8	24	1612.1
cb_21	2436	0	2016	0.2	4.9	1	25	243.6
cb_23	2502	0	2016	0.8	3.5	3	18	1668
cb_26	2517	0	2016	0.2	4.9	1	25	1636.1
cb_42	2626	0	2016	3.1	4.9	15	25	393.9
Cuba	4295	1	2016	8.2	10.6	87	54	2565.1
eb_1	2579	0	2016	0	4.9	0	25	1134.8
eb_17	2336	0	2016	0.4	4.9	2	25	2009
eb_23	2636	0	2016	0	4.3	0	22	1198.2
eb_28	2501	0	2016	0	4.7	0	24	1276.6
eb_35	2501	0	2016	0	4.5	0	23	489.3
eb_36	2501	0	2016	0.3	3.1	1	16	1133.3
eb_9	2501	0	2016	2	4.5	9	23	149.5
Entradas	4036	1	2016	6.2	12.4	77	63	2586.6
Ervidel	5926	0	2016	0.4	10.4	4	53	111.8
Evora1	2995	1	2016	0.7	5.7	4	29	2375.3
Evora2	3001	1	2016	0.7	5.9	4	30	2275.8
Ferrarias	1715	1	2016	1.3	3.1	4	16	482.3
Granja	2153	1	2016	0	3.9	0	20	457.5
Guadiana	3000	1	2016	3.1	5.9	18	30	1262.5
Mentiras	1911	1	2016	1.6	3.7	6	19	1043.5
Monforte	2000	1	2016	1	4.9	5	25	970
Mourao	3606	1	2016	0.2	5.7	1	29	1072.5
nb_17	2426	0	2016	0	4.3	0	22	1130.3
nb_2	2319	0	2016	0.2	4.9	1	25	487
nb_25	2364	0	2016	0.8	4.9	4	25	591
nb_35	2334	0	2016	0	4.9	0	25	805.2
nb_36	1844	0	2016	2.4	4.9	12	25	1106.4
nb_38	2496	0	2016	0.2	5.3	1	27	600.9
S Pedro	9997	0	2016	0.4	0	22	47	2499.25
Reguengos	3008	1	2016	2.2	6.7	15	34	1116.9
S Marcos	4416	1	2016	8.4	13.4	112	68	3044.1
S Vicente	3700	1	2016	2.9	5.9	17	30	3067.9
Sudoeste	1657	0	2016	0	3.3	0	17	938.2
T Bolsa	2955	1	2016	0.4	4.9	2	25	192.1
V Fernando	4718	1	2016	3	10.8	32	55	3002.4
Veiros	1814	1	2016	2.4	4.9	12	25	1260.7
A Chao	2000	0	2003-2006	2.1	0	10	25	950
Airoso	2094	1	2003-2006	1.3	4.9	6.5	25	596.8
bb_1	2502	0	2003-2006	1.6	4.9	8	25	957
bb_14	2501	0	2003-2006	0.4	4.9	2	25	68.8
bb_28	2507	0	2003-2006	1.6	4.9	8	25	1153.2
bb_33	2701	0	2003-2006	0.2	4.9	1	25	1269.5
bb_39	2333	0	2003-2006	1.6	4.9	8	25	1312.3
bb_43	2469	0	2003-2006	0.4	4.9	2	25	524.7
bb_44	2501	0	2003-2006	0.6	4.9	3	25	287.6
bb_5	2789	0	2003-2006	1	4.9	5	25	376.5
bb_6	2501	0	2003-2006	0.4	4.9	2	25	381.4
C Casevel	3001	1	2003-2006	3.8	5.5	21	28	1989.5
C Entradas	2990	1	2003-2006	2.4	5.9	14	30	946.8
C Maior	3112	1	2003-2006	3.6	6.5	23.01	33	400.7
C Salto	3005	1	2003-2006	5.1	4.9	25	25	991.7
cb_21	2436	0	2003-2006	2.4	4.9	12	25	1352
cb_23	2502	0	2003-2006	0.3	3.3	1	17	1297
cb_26	2517	0	2003-2006	0.2	4.9	1	25	1403.2
cb_42	2626	0	2003-2006	4.7	4.9	23	25	1431.2
Cuba	4295	1	2003-2006	8.1	10.6	86.31	54	1832.5
eb_1	2579	0	2003-2006	0	4.9	0	25	773.7
eb_17	2336	0	2003-2006	3.5	4.9	17	25	1705.3
eb_23	2636	0	2003-2006	3.3	4.9	16	25	1271.9
eb_28	2501	0	2003-2006	3.5	5.1	18	26	875.4
eb_35	2501	0	2003-2006	0.8	5.3	4	27	1424.8
eb_36	2501	0	2003-2006	0	4.5	0	23	1610.7
eb_9	2501	0	2003-2006	0	4.9	0	25	831.6
Entradas	4036	1	2003-2006	7.9	12.2	96.01	62	2224.1
Ervidel	5926	0	2003-2006	1.8	10.4	18.96	53	375
Evora1	2995	1	2003-2006	1.3	5.9	7.5	30	2595.7
Evora2	3001	1	2003-2006	0.9	5.9	5.5	30	1656.8
Ferrarias	1715	1	2003-2006	6.2	3.1	19.5	16	127.3
Granja	2153	1	2003-2006	2.9	4.1	12	21	115.3
Guadiana	3000	1	2003-2006	1.6	5.9	9.5	30	1487.5
Mentiras	1911	1	2003-2006	7	3.7	26	19	930.4
Monforte	2000	1	2003-2006	2	11.8	23	60	1281.3
Mourao	3606	1	2003-2006	1.3	5.7	7.5	29	808.2
nb_17	2426	0	2003-2006	0.6	4.9	3	25	921.9
nb_2	2319	0	2003-2006	0	4.9	0	25	197.1
nb_25	2364	0	2003-2006	1.6	4.9	8	25	945.6
nb_35	2334	0	2003-2006	1	4.9	5	25	921.9
nb_36	1844	0	2003-2006	0	4.9	0	25	1272.4
nb_38	2496	0	2003-2006	0	4.9	0	25	848.6
S Pedro	9997	0	2003-2006	7.1	0	67	48	7247.82
Reguengos	3008	1	2003-2006	5.2	5.9	30.5	30	1234.53
S Marcos	4416	1	2003-2006	9.7	13.4	129.96	68	2592.21
S Vicente	3700	1	2003-2006	8.6	7.3	62.5	37	2906.25
Sudoeste	1657	0	2003-2006	0	4.9	0	25	637.945
T Bolsa	2955	1	2003-2006	7.3	4.9	36	25	1477.5
V Fernando	4718	1	2003-2006	6.1	10.8	65.48	55	2428.59
Veiros	1814	1	2003-2006	3.7	4.9	17.99	25	1076.25
